# Supplementary material for: Isolation, Characterization, and Genomic Analysis of Pseudomonas sp. Strain SMT-1, an Efficient Fluorene-Degrading Bacterium
Source: PubMed Central journal article supplement — Evol Bioinform Online. 2019 Apr 15;15:1176934319843518. doi: 10.1177/1176934319843518 (PMC6466462; doi:10.1177/1176934319843518), 2019-04-15
Supplement: Supporting_information.pdf [file Supporting_information.pdf]

## Supporting information

### 1. Sequencing strategy

This project uses the Whole Genome Shotgun (WGS) strategy to construct different inserts. A Next-Generation Sequencing (NGS) DNA library was constructed and sequenced using the Illumina MiSeq- platform (2×250-bp paired end), which generated 4900736 reads. The data of each sample was statistically analyzed. The results are shown in Table S1. The total amount of sequence data comprises 1,224,164,919 bases

**Table S1** Sequencing strategies and statistics of sequencing data

| Sample | Library Name | Insert Size | Reads Number | Total Bases (bp) | N (%)  | GC (%) | Q20 (%) | Q30 (%) | Sequencing Platform | Sequencing Mode         |
|--------|--------------|-------------|--------------|------------------|--------|--------|---------|---------|---------------------|-------------------------|
| SMT-1  | PE400        | 400 bp      | 4,900,736    | 1,224,164,919    | 0.0003 | 61.59  | 93.86   | 84.36   | Illumina<br>Miseq   | Paired-end,<br>2×250 bp |

**Note:** N (%): percentage of fuzzy bases. Q20 (%): The percentage of bases with base recognition accuracy above 99%; Q30 (%): Percentage of bases with base recognition accuracy above 99.9%.

### 2. Data quality

The sequencing data contains some low-quality reads ends, which will make a big impact on subsequent information analysis. Interference, in order to ensure the quality of subsequent information analysis, further filtering of the off-machine data is required. Data filtering standards, including the following points:

- (1) Joint contamination removal, using adapter removal (ver. 2.1.7) (Mikkel S *et al.* 2016) to remove the low-quality ends;
- (2) The quality-controlled reads were assembled using SOAPec (v2.0) (Luo *et al.* 2012), with a default set of k-mer sizes and options.

**Table S2** Data quality filtering statistics

| Sample | HQ Reads  | HQ Reads % | HQ Data (bp)  | HQ Data % | Coverage (×) |
|--------|-----------|------------|---------------|-----------|--------------|
| SMT-1  | 4,769,110 | 97.31      | 1,120,252,671 | 91.51     | 183          |

**Note:** **HQ Reads%:** high quality reads as a percentage of the machine reads

**HQ Data (bp):** high quality reads base number

**HQ Data %:** The percentage of high-quality sequence bases in the base

**Coverage (×):** Refers to the depth of sequencing, where the genome size refers to the length of the genomic sequence obtained by splicing.

### 3. Data statistics

The basic information of the reading frame is shown in Table S3. The amino acid sequence of all open reading frames can be found in "\*.protein.faa".

**Table.S3** Open reading frame prediction data statistics

| Seq ID | Property                         | Value              |
|--------|----------------------------------|--------------------|
|        | ORF number                       | 5,619              |
|        | ORF total length                 | 5,345,943 bp       |
|        | ORF density                      | 0.919 genes per kb |
| SMT-1  | Longest ORF length               | 18,933 bp          |
|        | ORF average length               | 951.4 bp           |
|        | Intergenic region length         | 762,294 bp         |
|        | ORF / Genome (coding percentage) | 87.50%             |
|        | Intergenic length / Genome       | 12.50%             |
|        | GC content in ORF region         | 62.40%             |
|        | GC content in intergenic region  | 55.80%             |

#### 4. CRISPR

Using the CRISPR finder (<http://crispr.i2bc.paris-saclay.fr/Server/>) to predict DRs in the whole genome (forward repeat) and spacers (Bland *et al.* 2007). We obtained 3 CRISPR samples in the SMT-1 genome. The CRISPRs structure, statistical results also determined.

**Table S4** CRISPR forecast results

| Sample ID | Sequence Name | ID | CRISPRs type | Start   | End     | Number of Spacer | Length (bp) | Genome % |
|-----------|---------------|----|--------------|---------|---------|------------------|-------------|----------|
| SMT-1     | contig11      | 1  | Questionable | 120,173 | 120,293 | 1                | 120         | 0.0020   |
|           | Contig21      | 1  | Confirmed    | 65,652  | 65,980  | 6                | 328         | 0.0054   |
|           | Contig33      | 1  | Questionable | 256     | 329     | 1                | 73          | 0.0012   |

#### 5. Protein coding gene function annotation

The main purpose of functional annotation of protein-coding genes is to functionally resolve all protein-coding genes, thereby the species is analyzed horizontally. The main method for functional annotation of protein-coding genes is to encode all predicted protein-coding genes into various databases. In general, the longer the region of the two sequences is aligned, the higher the sequence identity of the two sequences. The annotation of the eggNOG of the protein-coding gene is done using the blast software, and the database used by blast is eggNOG (V4), the critical value is selected  $1e-6$ ; the function discriminant rule of eggNOG is:  $E\text{-value} < 1e-6$ . Protein coding gene function annotation information of SMT-1 were indicated in Table S5.

**Table.S5** Protein coding gene function annotation

| Sample | Annotation in Database | No. Of Genes | %      |
|--------|------------------------|--------------|--------|
|        | NR                     | 5,503        | 97.94% |
|        | eggNOG                 | 4,882        | 86.88% |

|              |            |       |        |
|--------------|------------|-------|--------|
| <b>SMT-1</b> | KEGG       | 2,764 | 49.19% |
|              | Swiss-Prot | 3,966 | 70.58% |
|              | GO         | 4,052 | 72.11% |

---
